# Supplementary material
Source: Springer Nature journal article supplement (https://www.springermedizin.de/resource/supplementary/13601_2013_1076_MOESM5_ESM.pdf/9678582)

A

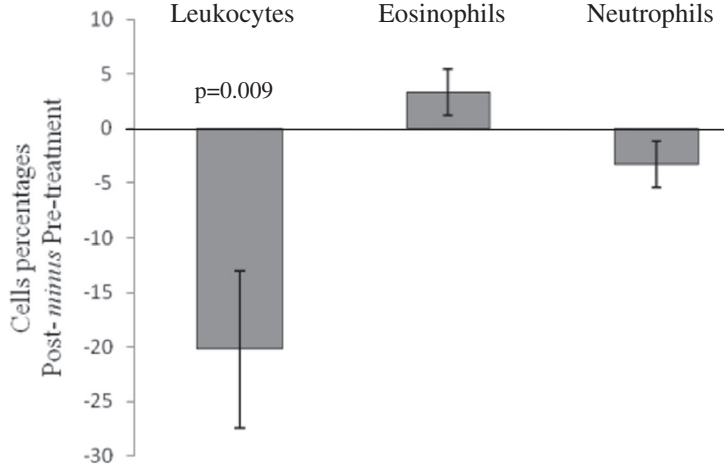

B

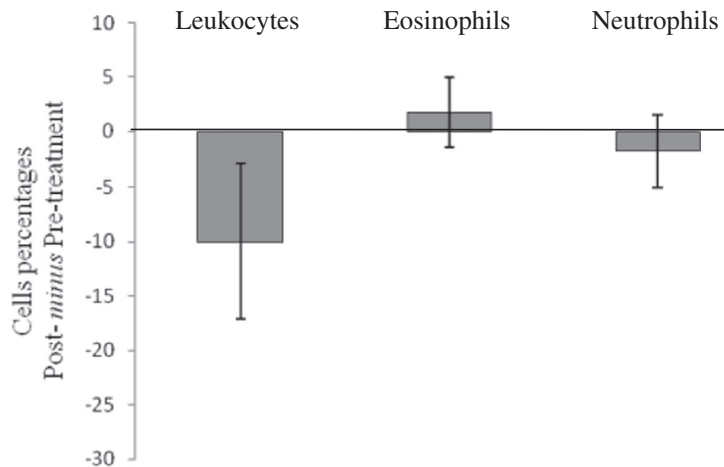

Supplement: MOESM5 [file 9678582]
